# Supplementary material for: Syntheses of new zeolitic imidazolate frameworks in dimethyl sulfoxide
Source: Royal Society of Chemistry journal article supplement (doi:10.1039/d1qi01538a), 2022-01-01
Supplement: d1qi01538a1.pdf [file d1qi01538a1.pdf]

## Supporting Information

# Syntheses of New Zeolitic Zeolitic Imidazolate Frameworks in Dimethyl Sulfoxide

Shen Guo<sup>1,2</sup>, Hui-Zi Li<sup>1</sup>, Zhi-Wen Wang<sup>1</sup>, Zi-Yi Zhu<sup>1</sup>, Shu-Hua Zhang<sup>2</sup>, Fei Wang<sup>1\*</sup>  
and Jian Zhang<sup>1</sup>

<sup>1</sup> State Key Laboratory of Structural Chemistry, Fujian Institute of Research on the Structure of Matter, the Chinese Academy of Sciences, Fuzhou, Fujian 350002, P. R. China. E-mail: wangfei04@fjirsm.ac.cn

<sup>2</sup> Guilin College of Chemistry and Bioengineering, Guilin University of Technology, Guilin 541004, P. R. China.

## CONTENT

|                                                                           |    |
|---------------------------------------------------------------------------|----|
| 1. Materials and Characterization .....                                   | 2  |
| 2. Single crystal synthesis and characterization of compounds 1-6.....    | 2  |
| 2.1. Synthesis of Compounds 1-6 .....                                     | 2  |
| 2.2. Characterization of Compounds 1-6 .....                              | 3  |
| 2.2.1. Summary of Im-based ZIFs with different topological networks ..... | 3  |
| 2.2.2. Single crystal structure determination.....                        | 4  |
| 2.2.3. Optical photographs compound 1-6 .....                             | 5  |
| 2.2.4. Crystal structure diagrams of compound 2-6 .....                   | 6  |
| 2.2.5. Basic characterization of Compounds 1-6 .....                      | 7  |
| 3. Adsorption Characterization .....                                      | 10 |
| 4. References .....                                                       | 11 |

## 1. Materials and Characterization

All reagents were purchased commercially and used without further purification. All syntheses were carried out in a 20 ml vial under autogenous pressure. All Powder X-ray diffraction analyses were recorded on a Rigaku Dmax2500 diffractometer with Cu K $\alpha$  radiation ( $\lambda = 1.54056 \text{ \AA}$ ) with a step size of  $5^\circ$ . Thermal stability studies were carried out on a NETSCHZ STA-449C thermoanalyzer with a heating rate of  $10^\circ\text{C}/\text{min}$  under a nitrogen atmosphere. The gases adsorption isotherms were measured by using ASAP 2020 volumetric adsorption equipment.

## 2. Single crystal synthesis and characterization of compounds 1-6

### 2.1. Synthesis of Compounds 1-6

**Synthesis of  $\text{Zn}_8(\text{Im})_{16}\cdot x\text{DMSO}$  (1, ACO topology):** The  $\text{Zn}(\text{CH}_3\text{CO}_2)_2\cdot 2\text{H}_2\text{O}$  (1 mmol, 0.219 g) was dissolved in 3 mL dimethyl sulfoxide (DMSO), Imidazole (2 mmol, 0.136 g) was added to the above solution and then reacted in an oven at  $60^\circ\text{C}$  for 3 days. The colorless rhomboid block crystal was obtained, washed with DMSO, and dried at room temperature (Yield: ca. 81% Based on the mole ratio of zinc salts). The crystal can be synthesized with zinc acetate dihydrate and imidazole in a wide range of ratios from 1:1 to 1:8.

**Synthesis of  $\text{Zn}_3(\text{Im})_6\cdot x\text{DMSO}$  (2, hlw topology):** The  $\text{Zn}(\text{CH}_3\text{CO}_2)_2\cdot 2\text{H}_2\text{O}$  (0.5 mmol, 0.109 g) was dissolved in 3 mL DMSO, Imidazole (2 mmol, 0.136 g) and 2-Ethylimidazole (0.5 mmol, 0.048 g) was added to the above solution and then reacted in an oven at  $100^\circ\text{C}$  for 3 days. The colorless strip crystal was obtained, washed with DMSO, and dried at room temperature (Yield: ca. 56% Based on the mole ratio of zinc salts). Compound 1 is also easily obtained by this scheme, and pure phase Compound 3 can be obtained in some specific ratio.

**Synthesis of  $\text{Zn}_4(\text{Im})_8\cdot x\text{DMSO}$  (3, coi topology):** The  $\text{Zn}(\text{CH}_3\text{CO}_2)_2\cdot 2\text{H}_2\text{O}$  (0.5 mmol, 0.109 g) was dissolved in 3 mL DMSO, Imidazole (2.5 mmol, 0.170 g) and 2-

Propylimidazole (0.5 mmol, 0.055 g) was added to the above solution and then reacted in an oven at 100 °C for 3 days. The colorless rod-shaped crystal was obtained, washed with DMSO, and dried at room temperature (Yield: ca. 84% Based on the mole ratio of zinc salts).

**Synthesis of  $\text{Zn}_2(\text{Im})_2(\text{mim})_2 \cdot x\text{DMSO}$  (4, zni topology):** The  $\text{Zn}(\text{CH}_3\text{CO}_2)_2 \cdot 2\text{H}_2\text{O}$  (0.5 mmol, 0.109g) was dissolved in 3 mL DMSO, Imidazole (1 mmol, 0.068 g) and 2-Methylimidazole (Hmim, 0.5 mmol, 0.041 g) was added to the above solution and then reacted in an oven at 100 °C for 3 days. The colorless spindle crystal was obtained, washed with DMSO, and dried at room temperature (Yield: ca. 55% Based on the mole ratio of zinc salts).

**Synthesis of  $\text{Zn}(\text{Im})(\text{dmbim}) \cdot x\text{DMSO}$  (5, GIS topology):** The  $\text{Zn}(\text{CH}_3\text{CO}_2)_2 \cdot 2\text{H}_2\text{O}$  (0.5 mmol, 0.109 g) was dissolved in 3 mL DMSO, Imidazole (1 mmol, 0.068 g) and 5,6-Dimethylbenzimidazole (Hdmbim, 0.5 mmol, 0.073 g) was added to the above solution and then reacted in an oven at 100 °C for 3 days. The colorless crystal was obtained, washed with DMSO, and dried at room temperature (Yield: ca. 76% Based on the mole ratio of zinc salts).

**Synthesis of  $\text{Zn}(\text{eim})_2 \cdot x\text{DMSO}$  (6, ANA topology):** The  $\text{Zn}(\text{CH}_3\text{CO}_2)_2 \cdot 2\text{H}_2\text{O}$  (0.5 mmol, 0.109 g) was dissolved in 3 mL DMSO, 2-Ethylimidazole (2 mmol, 0.192 g) was added to the above solution and then reacted in an oven at 100 °C for 3 days. The colorless polyhedral crystal was obtained, washed with DMSO, and dried at room temperature (Yield: ca. 49% Based on the mole ratio of zinc salts).

## 2.2. Characterization of Compounds 1-6

### 2.2.1. Summary of Im-based ZIFs with different topological networks

**Table S1.** Summary of Im-based ZIFs with different topological networks.

| Topology | Name or CCDC code          | Formula                           | Solvent/SDAs | Density Mg/m <sup>3</sup> | Pore volume cm <sup>3</sup> /g | BET m <sup>2</sup> /g | Ref. |
|----------|----------------------------|-----------------------------------|--------------|---------------------------|--------------------------------|-----------------------|------|
| AFI      | AFI-[Zn(Im) <sub>2</sub> ] | Zn(Im) <sub>2</sub>               | DPF          | --                        | 0.64                           | 1386                  | [1]  |
| BCT/crb  | ZIF-1                      | Zn <sub>2</sub> (Im) <sub>4</sub> | DMF          | 1.471                     | -                              | -                     | [2]  |
| BCT/crb  | ZIF-2                      | Zn <sub>2</sub> (Im) <sub>4</sub> | DMF          | 1.390                     | -                              | -                     | [2]  |

|         |                                                                 |                                     |                     |       |       |      |           |
|---------|-----------------------------------------------------------------|-------------------------------------|---------------------|-------|-------|------|-----------|
| BCT/crb | ZIF-64                                                          | Zn <sub>4</sub> (Im) <sub>8</sub>   | DMF                 | 1.449 | -     | -    | [3]       |
| BCT/crb | VEJYEP01                                                        | Zn <sub>2</sub> (Im) <sub>4</sub>   | DMA                 | 1.465 | -     | -    | [4]       |
| BCT/crb | VEJYIT01                                                        | Zn <sub>2</sub> (Im) <sub>4</sub>   | DMF                 | 1.428 | -     | -    | [4]       |
| CAN     | CAN-[Zn(Im) <sub>2</sub> ]                                      | Zn <sub>3</sub> (Im) <sub>6</sub>   | DBF                 | 1.181 | 0.54  | 1178 | [1]       |
| DFT     | ZIF-3                                                           | Zn(Im) <sub>2</sub>                 | DMF+NMP             | 1.092 | 0.348 | 2030 | [2]       |
| DFT     | HIFVOI                                                          | Zn(Im) <sub>2</sub>                 | NMP                 | 0.931 | -     | -    | [4]       |
| GIS     | ZIF-6                                                           | Zn(Im) <sub>2</sub>                 | DMF                 | 0.794 | 0.749 | 1076 | [2]       |
| GIS     | HIFVUO                                                          | Zn(Im) <sub>2</sub>                 | DEF                 | 0.719 | -     | -    | [4]       |
| MER     | ZIF-10                                                          | Zn(Im) <sub>2</sub>                 | DMF                 | 0.787 | -     | -    | [2]       |
| MER     | mer-MeMeCH <sub>2</sub> @<br>-Zn <sub>16</sub> Im <sub>32</sub> | Zn <sub>16</sub> (Im) <sub>32</sub> | MeMeCH <sub>2</sub> | 1.561 | 0.74  | 1970 | [5]       |
| RHO     | xMeMeCH <sub>2</sub> @RH<br>O-Zn <sub>16</sub> Im <sub>32</sub> | Zn <sub>16</sub> (Im) <sub>32</sub> | MeMeCH <sub>2</sub> | 1.183 | 0.70  | 1650 | [6]       |
| cag     | ZIF-4                                                           | Zn <sub>2</sub> (Im) <sub>4</sub>   | DMF                 | 1.444 | 0.343 | 300  | [2]       |
| cag     | VEJYUF01                                                        | Zn <sub>2</sub> (Im) <sub>4</sub>   | DMF                 | 1.434 | -     | -    | [4]       |
| coi     | EQOCOC                                                          | Zn <sub>4</sub> (Im) <sub>8</sub>   | H <sub>2</sub> O    | -     | -     | -    | [7]       |
| neb     | KEVLEE                                                          | Zn(Im) <sub>2</sub>                 | pyridine            | 1.543 | -     | -    | [8]       |
| nog     | HIFWAV                                                          | Zn <sub>5</sub> (Im) <sub>10</sub>  | DEF                 | 1.258 | -     | -    | [4]       |
| unknown | GOQSIQ                                                          | Zn <sub>10</sub> (Im) <sub>20</sub> | DBF                 | 1.401 | 0.49  | 319  | [9]       |
| zec     | HICGEG                                                          | Zn <sub>5</sub> (Im) <sub>10</sub>  | DEF                 | 1.081 | -     | -    | [4]       |
| zni     | IMIDZB                                                          | Zn <sub>2</sub> (Im) <sub>4</sub>   | H <sub>2</sub> O    | 1.57  | -     | -    | [10]      |
| ATN     | ATN-[Zn(Im) <sub>2</sub> ]                                      | Zn <sub>2</sub> (Im) <sub>4</sub>   | DPF+BA              | 0.938 | 0.48  | 48   | [11]      |
| nog     | nog-[Zn(Im) <sub>2</sub> ]                                      | Zn <sub>2</sub> (Im) <sub>4</sub>   | BA                  | -     | 0.41  | 1032 | [11]      |
| ACO     | Compound 1                                                      | Zn <sub>8</sub> (Im) <sub>16</sub>  | DMSO                | 0.920 |       |      | This work |
| hlw     | Compound 2                                                      | Zn <sub>3</sub> (Im) <sub>6</sub>   | DMSO                | 1.187 | 0.23  | 524  | This work |
| coi     | Compound 3                                                      | Zn <sub>4</sub> (Im) <sub>8</sub>   | DMSO                | 1.575 |       |      | This work |

DMF = N,N-dimethylformamide; DMA = N,N-dimethylacetamide; DPF = N,N-dipropylformamide; DBF = N,N-dibutylformamide; BA = n-butylamine; NMP = N-methyl pyrrolidone; DMSO = Dimethyl Sulfoxide; DEF = N,N-Dimethylacetamide; MeMeCH<sub>2</sub> = 1, 7, 11, 15, 21, 23, 25, 28-octamethyl-2,20:3,19-dimetheno-1H, 21H, 23H, 25H-bis[1,3]dioxocino[5,4-i:5',4'-i']benzo[1,2-d:5,4-d']-bis[1,3]benzodioxocin. SDAs = Structure directing-agent.

## 2.2.2. Single crystal structure determination

**Table S2.** Crystal data and structure refinement for Compounds 1-6.

| Compounds      | 1                                                               | 2                                                               | 3                                                               | 4                                                              | 5                                                 | 6                                                 |
|----------------|-----------------------------------------------------------------|-----------------------------------------------------------------|-----------------------------------------------------------------|----------------------------------------------------------------|---------------------------------------------------|---------------------------------------------------|
| Formula        | C <sub>48</sub> H <sub>48</sub> N <sub>32</sub> Zn <sub>8</sub> | C <sub>18</sub> H <sub>18</sub> N <sub>12</sub> Zn <sub>3</sub> | C <sub>24</sub> H <sub>24</sub> N <sub>16</sub> Zn <sub>4</sub> | C <sub>14</sub> H <sub>16</sub> N <sub>8</sub> Zn <sub>2</sub> | C <sub>12</sub> H <sub>12</sub> N <sub>4</sub> Zn | C <sub>10</sub> H <sub>14</sub> N <sub>4</sub> Zn |
| Weight         | 1596.12                                                         | 598.55                                                          | 798.07                                                          | 426.06                                                         | 277.63                                            | 255.61                                            |
| Crystal system | trigonal                                                        | monoclinic                                                      | tetragonal                                                      | tetragonal                                                     | tetragonal                                        | cubic                                             |
| Space group    | <i>R</i> -3 <i>c</i>                                            | <i>C</i> 2/ <i>m</i>                                            | <i>I</i> 4 <sub>1</sub>                                         | <i>I</i> 4 <sub>1</sub> / <i>acd</i>                           | <i>I</i> 4 <sub>1</sub> / <i>a</i>                | <i>I</i> a-3 <i>d</i>                             |
| a/Å            | 24.6591(3)                                                      | 14.10730(10)                                                    | 22.8159(8)                                                      | 23.5113(7)                                                     | 16.5658(2)                                        | 26.5050(3)                                        |

|                                            |                                                      |                                                      |                                                      |                                                      |                                                      |                                                      |
|--------------------------------------------|------------------------------------------------------|------------------------------------------------------|------------------------------------------------------|------------------------------------------------------|------------------------------------------------------|------------------------------------------------------|
| b/Å                                        | 24.6591(3)                                           | 24.1246(2)                                           | 22.8159(8)                                           | 23.5113(7)                                           | 16.5658(2)                                           | 26.5050(3)                                           |
| c/Å                                        | 32.7669(5)                                           | 19.8844(2)                                           | 12.9339(7)                                           | 12.6103(14)                                          | 21.3167(3)                                           | 26.5050(3)                                           |
| $\alpha$ /°                                | 90                                                   | 90                                                   | 90                                                   | 90                                                   | 90                                                   | 90                                                   |
| $\beta$ /°                                 | 90                                                   | 98.2080(10)                                          | 90                                                   | 90                                                   | 90                                                   | 90                                                   |
| $\gamma$ /°                                | 120                                                  | 90                                                   | 90                                                   | 90                                                   | 90                                                   | 90                                                   |
| Volume/Å <sup>3</sup>                      | 17255.2(5)                                           | 6697.99(10)                                          | 6732.9(6)                                            | 6970.7(9)                                            | 5849.85(16)                                          | 18620.2(6)                                           |
| Z                                          | 6                                                    | 8                                                    | 8                                                    | 16                                                   | 16                                                   | 48                                                   |
| $\rho_{\text{calc}}/\text{cm}^3$           | 0.920                                                | 1.187                                                | 1.575                                                | 1.616                                                | 1.261                                                | 1.086                                                |
| GOOF                                       | 1.052                                                | 1.071                                                | 1.048                                                | 1.142                                                | 1.063                                                | 1.129                                                |
| Final R indexes<br>[I] $\geq 2\sigma$ (I)] | R <sub>1</sub> = 0.0557,<br>wR <sub>2</sub> = 0.1856 | R <sub>1</sub> = 0.0404,<br>wR <sub>2</sub> = 0.1174 | R <sub>1</sub> = 0.0469,<br>wR <sub>2</sub> = 0.1218 | R <sub>1</sub> = 0.1015,<br>wR <sub>2</sub> = 0.2590 | R <sub>1</sub> = 0.0723,<br>wR <sub>2</sub> = 0.1921 | R <sub>1</sub> = 0.0374,<br>wR <sub>2</sub> = 0.1114 |
| Final R indexes<br>[all data]              | R <sub>1</sub> = 0.0595,<br>wR <sub>2</sub> = 0.1891 | R <sub>1</sub> = 0.0455,<br>wR <sub>2</sub> = 0.1201 | R <sub>1</sub> = 0.0529,<br>wR <sub>2</sub> = 0.1260 | R <sub>1</sub> = 0.1095,<br>wR <sub>2</sub> = 0.2658 | R <sub>1</sub> = 0.0856,<br>wR <sub>2</sub> = 0.2011 | R <sub>1</sub> = 0.0418,<br>wR <sub>2</sub> = 0.1157 |
| CCDC No.                                   | 2115206                                              | 2115210                                              | 2115208                                              | 2115211                                              | 2115209                                              | 2115207                                              |

**Table S3.** The summary of experimental results from imidazole ligands in DMSO.

| mmol ratio(Zn : Im)<br>/ Temature | 100 °C                 | 80 °C                  | 60 °C                  |
|-----------------------------------|------------------------|------------------------|------------------------|
| 0.5 : 0.5                         | Compound 1             | solution               | solution               |
| 0.5 : 1                           | Compound 1+ Compound 3 | Compound 1             | Compound 1             |
| 0.5 : 1.5                         | Compound 1+ Compound 3 | Compound 1+ Compound 3 | Compound 1             |
| 0.5 : 2                           | Compound 1+ Compound 3 | Compound 1+ Compound 3 | Compound 1             |
| 0.5 : 2.5                         | Compound 1+ Compound 3 | Compound 1+ Compound 3 | Compound 1             |
| 0.5 : 3                           | Compound 1+ Compound 3 | Compound 1+ Compound 3 | Compound 1             |
| 0.5 : 3.5                         | Compound 1+ Compound 3 | Compound 1+ Compound 3 | Compound 1             |
| 0.5 : 4                           | Compound 1+ Compound 3 | Compound 1             | Compound 1             |
| 0.5 : 4.5                         | Compound 1+ Compound 3 | Compound 1             | Compound 1+ Compound 3 |
| 0.5 : 5                           | Compound 1+ Compound 3 | Compound 1             | Compound 1+ Compound 3 |
| 0.5 : 5.5                         | Compound 1+ Compound 3 | Compound 1             | Compound 1             |
| 0.5 : 6                           | Compound 1+ Compound 3 | Compound 1+ Compound 3 | Compound 1             |

The mixture of Zinc acetate +DMSO+ Imidazole was heated at different temperatures for three days. The amount of DMSO was 3mL.

**Table S4.** The summary of experimental results from imidazole and 2-Propylimidazole mixed ligands in DMSO.

| mmol ratio(Zn : Im) / Temature | 100 °C     | 80 °C      | 60 °C      |
|--------------------------------|------------|------------|------------|
| 0.5 : 0.5                      | Compound 3 | solution   | solution   |
| 0.5 : 1                        | Compound 3 | Compound 3 | Compound 1 |
| 0.5 : 1.5                      | Compound 3 | Compound 3 | Compound 1 |
| 0.5 : 2                        | Compound 3 | Compound 3 | Compound 1 |
| 0.5 : 2.5                      | Compound 3 | Compound 3 | Compound 1 |
| 0.5 : 3                        | Compound 3 | Compound 3 | Compound 1 |

|           |            |            |            |
|-----------|------------|------------|------------|
| 0.5 : 3.5 | Compound 3 | Compound 3 | Compound 1 |
| 0.5 : 4   | Compound 3 | Compound 3 | Compound 1 |
| 0.5 : 4.5 | Compound 3 | Compound 3 | Compound 3 |
| 0.5 : 5   | Compound 3 | Compound 3 | Compound 3 |
| 0.5 : 5.5 | Compound 3 | Compound 3 | Compound 3 |
| 0.5 : 6   | Compound 3 | Compound 3 | Compound 3 |
| 1 : 0.5   | -          | -          | solution   |
| 1 : 1     | Compound 3 | Compound 3 | solution   |
| 1 : 1.5   | Compound 3 | Compound 1 | Compound 1 |
| 1 : 2     | Compound 1 | Compound 1 | Compound 1 |
| 1 : 2.5   | Compound 1 | Compound 3 | Compound 1 |
| 1.5 : 0.5 | Compound 3 | -          | solution   |
| 1.5 : 1   | -          | Compound 1 | Compound 1 |
| 1.5 : 1.5 | -          | Compound 1 | Compound 1 |
| 1.5 : 2   | Compound 3 | -          | Compound 3 |
| 1.5 : 2.5 | Compound 3 | Compound 3 | Compound 1 |
| 1 : 3     | Compound 1 | Compound 1 | Compound 1 |

The mixture of Zinc acetate +DMSO+ Imidazole + 2-Propylimidazole was heated at different temperatures for three days. The amount of 2-Propylimidazole was fixed at 0.5 mmol and DMSO was 3mL.

**Table S5.** The summary of experimental results from 2-ethylimidazole and imidazole mixed ligands in DMSO.

| mmol ratio(Zn : Im) / Temature | 100 °C     | 80 °C      | 60 °C      |
|--------------------------------|------------|------------|------------|
| 0.5 : 0.5                      | solution   | solution   | solution   |
| 0.5 : 1                        | Compound 1 | Compound 1 | Compound 1 |
| 0.5 : 1.5                      | Compound 2 | Compound 1 | Compound 1 |
| 0.5 : 2                        | Compound 2 | Compound 2 | Compound 2 |
| 0.5 : 2.5                      | Compound 2 | Compound 2 | Compound 2 |
| 1: 0.5                         | solution   | solution   | solution   |
| 1: 1                           | solution   | solution   | solution   |
| 1: 1.5                         | Compound 1 | Compound 1 | Compound 1 |
| 1: 2                           | Compound 2 | Compound 2 | Compound 2 |
| 1: 2.5                         | Compound 2 | Compound 2 | Compound 2 |

The mixture of Zinc acetate +DMSO+ Imidazole + 2-Ethylimidazole was heated at different temperatures for three days. The amount of 2-ethylimidazole was fixed at 0.5 mmol and DMSO was 3mL.

**Table S6.** The comparison of the solvents for the syntheses of compounds 3-6 and earlier reported isostructural compounds.

|            | Solvent | Name or CCDC code | Earlier reported                    | Ref  |
|------------|---------|-------------------|-------------------------------------|------|
| Compound 3 | DMSO    | EQOCOC            | Pyridine+ Ethanol                   | [7]  |
| Compound 4 | DMSO    | ZIF-61            | DMF+DEF                             | [12] |
| Compound 5 | DMSO    | TIF-5Zn           | 2-amino-1-butanol+ <i>p</i> -xylene | [13] |
| Compound 6 | DMSO    | MAF-5             | Methanol+ benzene                   | [14] |

### 2.2.3. Optical photographs of compounds 1-6

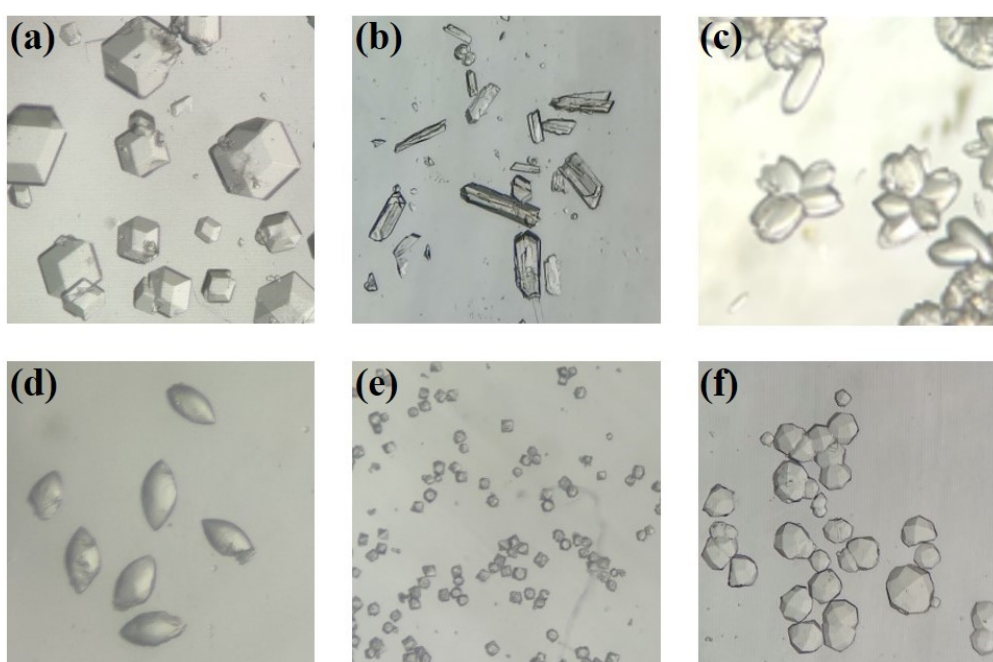

**Figure S1.** Crystal photographs of Compounds 1-6 corresponding to (a)-(f) respectively.

## 2.2.4. Crystal structure diagrams of compounds 2-6

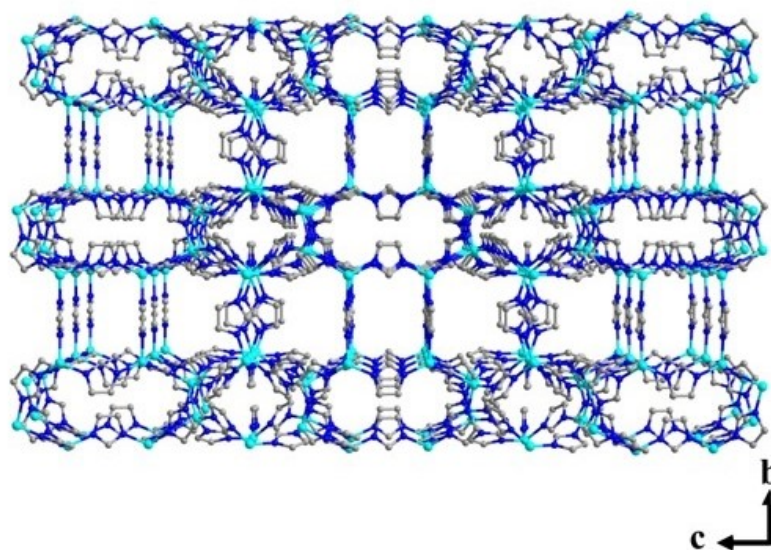

**Figure S2.** View of the 3D framework of compound 2 along a-axis.

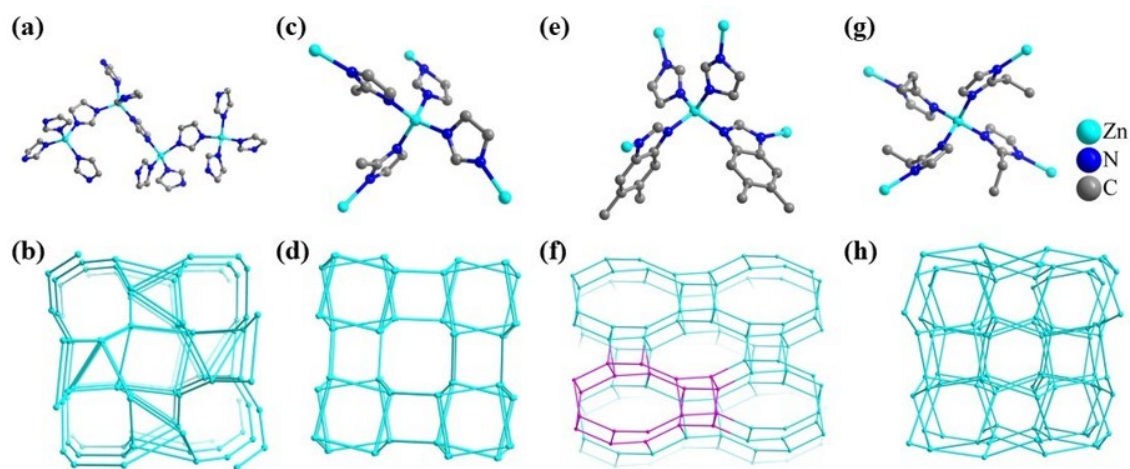

**Figure S3.** (a) the coordination environment of Zn atoms in compound 3; (b) the coi topology of compound 3; (c) the coordination environment of Zn atoms in compound 4; (d) the zni topology of compound 4; (e) the coordination environment of Zn atoms in compound 5; (f) the GIS topology of compound 5, one GIS cage was highlighted in pink; (g) the coordination environment of Zn atoms in compound 6; (h) the ANA topology of compound 6.



## 2.2.5. Basic characterization of compounds 1-6

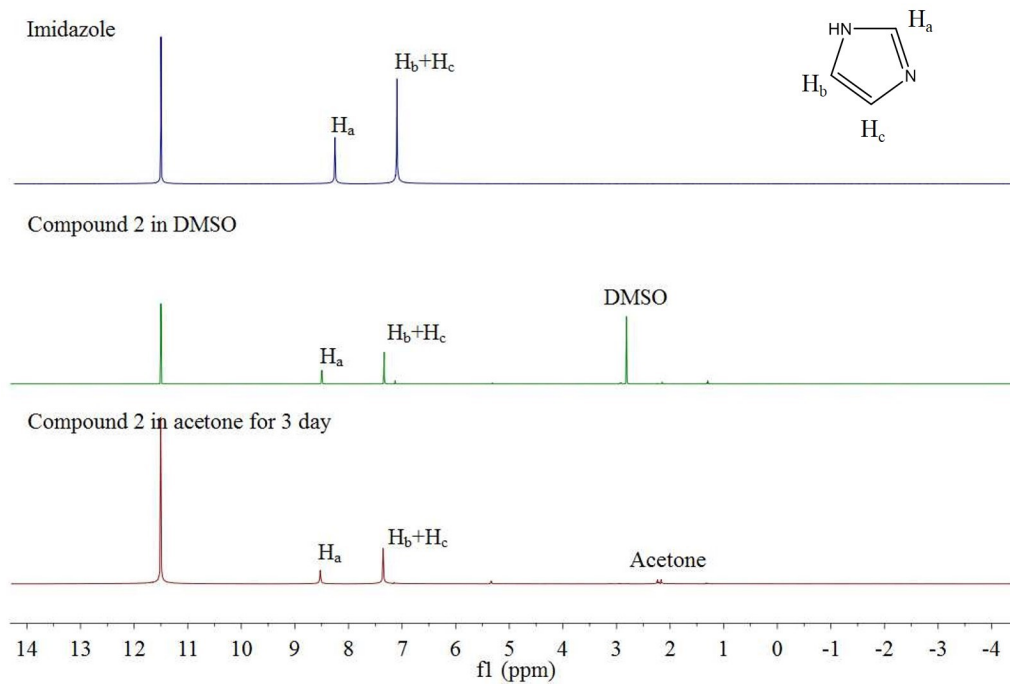

**Figure S4.** the  $^1\text{H}$  NMR spectra of Imidazole, compound 2 in DMSO and acetone for 3 day. Sample was washed with DMSO and dissolved with Trifluoroacetic Acid-d(Isotopic) ( $\delta = 11.50$ ).

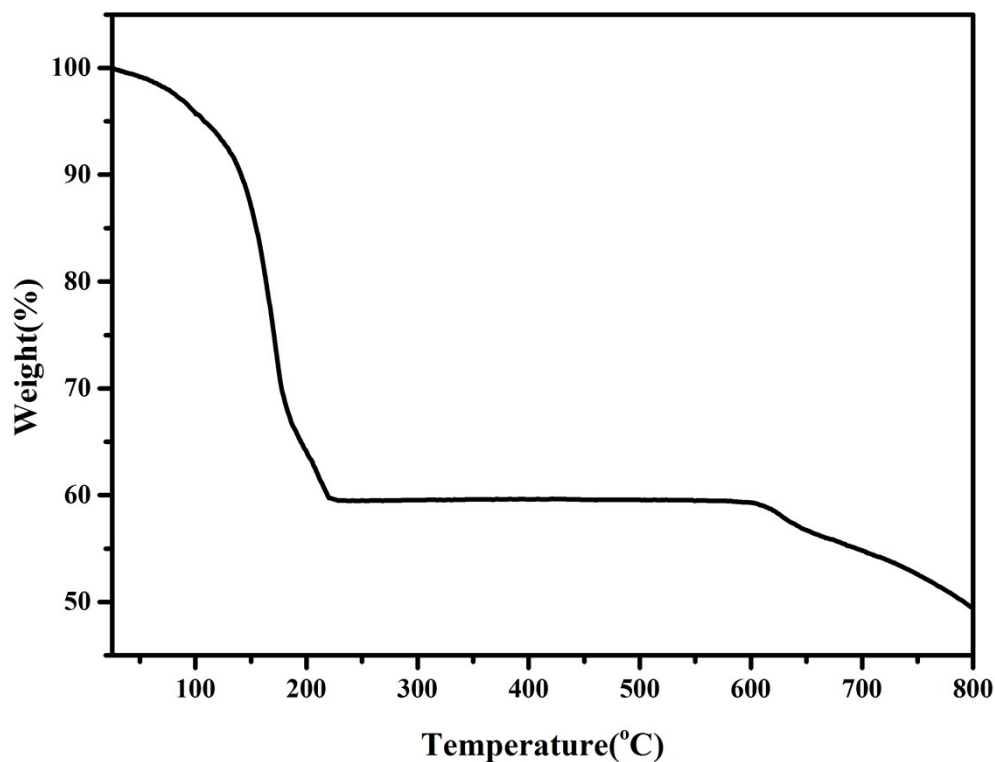

**Figure S5.** The TG plots of as synthesized samples compound 1.

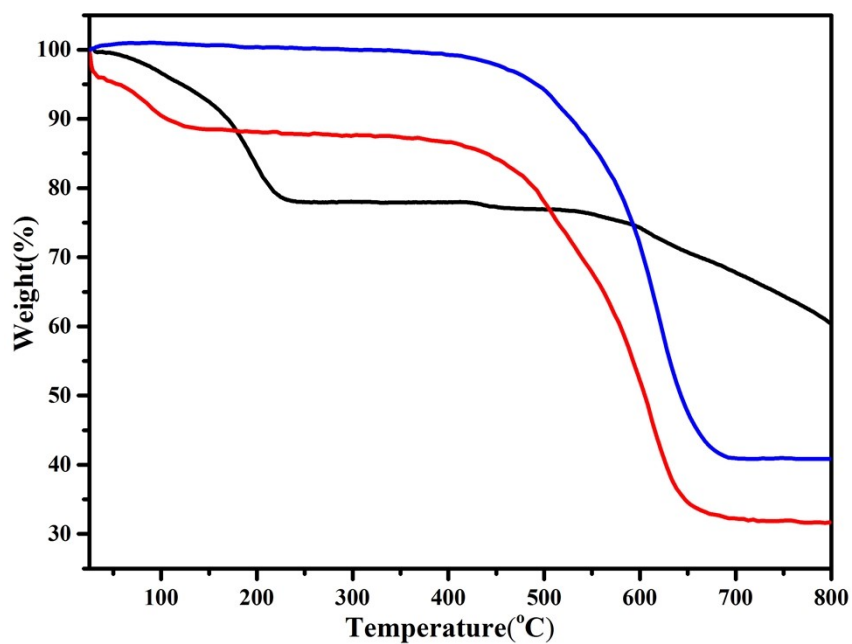

**Figure S6.** The TG plots of as synthesized samples compound 2 (black line), acetone exchanged samples (red line), activated samples at 100 °C (blue line).

The TGA descriptions of compounds 1 and 2:

For compound 1, the weight loss at 25°C~225°C is close to 60%, and the reason is analysed that the compound gradually loses the DMSO guest molecules in the

periphery and pores; The stable platform can be shown that the structure can maintain good thermal stability before 600 °C. With the further increase of the temperature, the weight loss during the period of 600 °C to 800 °C indicates that the structure collapses. Similarly, for Compound 2, the weight loss of about 32% during the period from 25 °C to 227 °C is also the weight loss of DMSO guest molecules around the compound and in the pores. The plateau between 227°C and 500°C indicates that the structure remains stable during this period. As the temperature further increases, the compound begins to lose weight gradually, and the framework is destroyed.

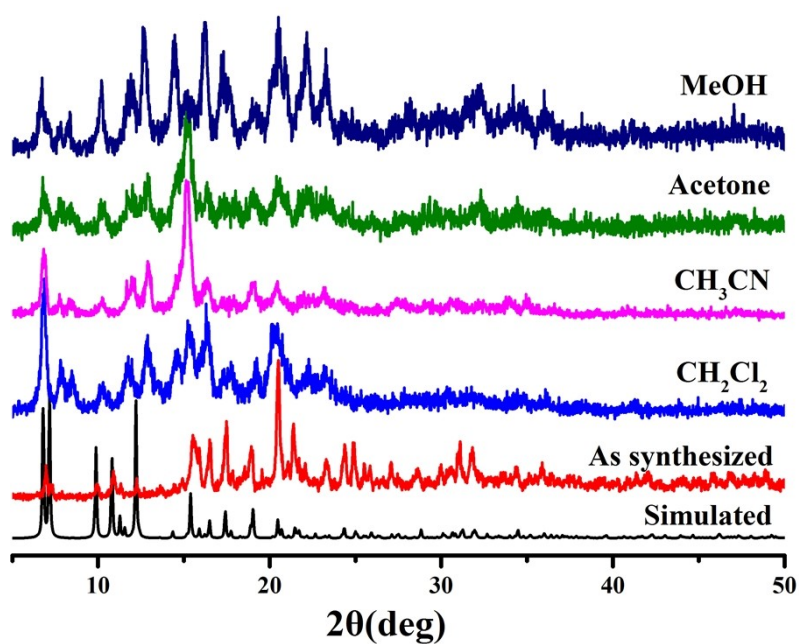

*Figure S7.* The PXRD patterns of compound 1 in different solutions.

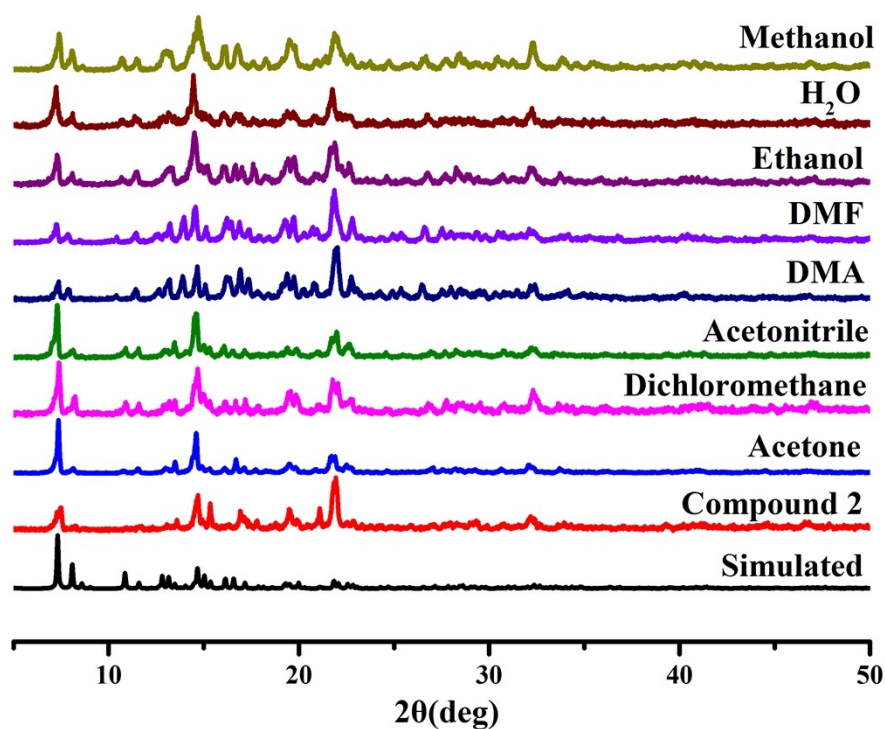

**Figure S8.** The PXR D patterns of compound 2 under different conditions.

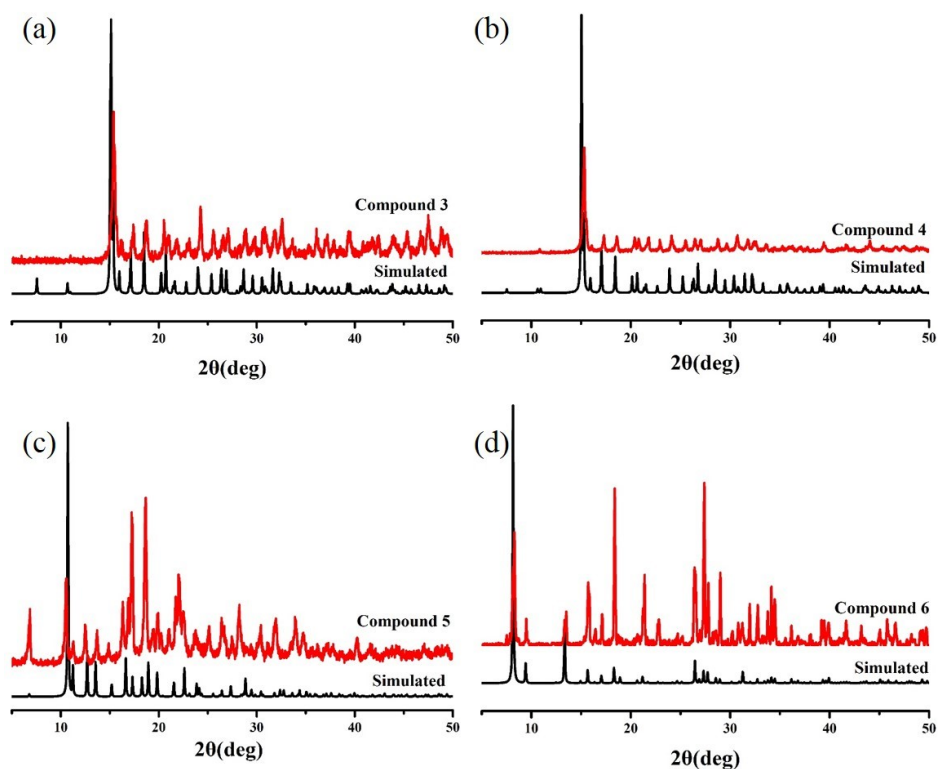

**Figure S9.** The PXR D patterns of Compounds 3-6 corresponding to (a)-(d) respectively.

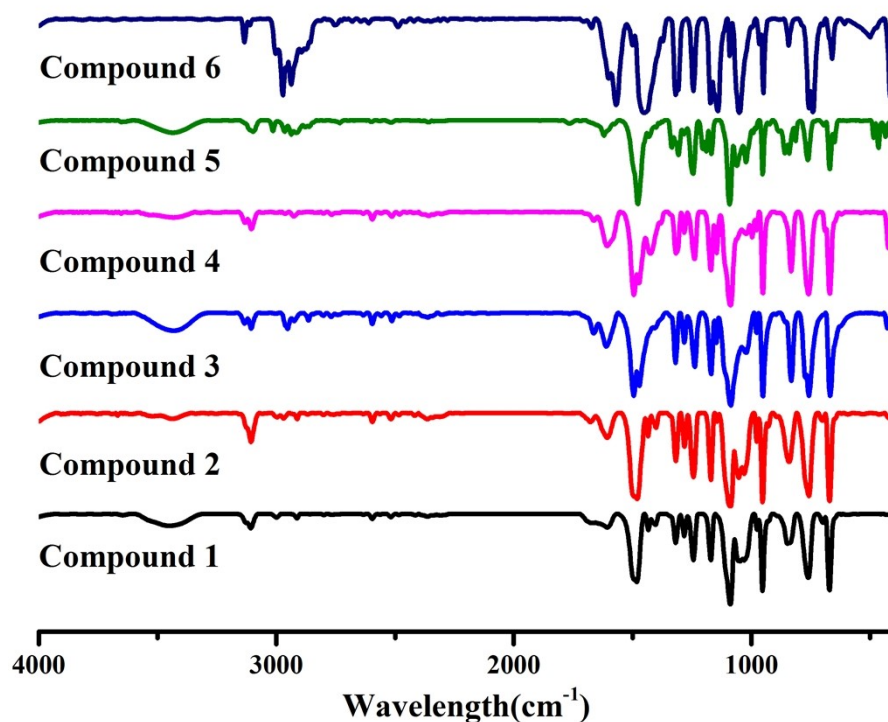

**Figure S10.** The IR of Compounds 1-6.

The FTIR data for Compounds 1-6 have been shown in Figure S10. The Compounds 1-3 are all composed of imidazole, so the infrared images of compounds are basically consistent. The difference between Compound 4 and the former lies in the addition of 2-methylimidazole, while the characteristic peak of methyl is near  $2900\text{ cm}^{-1}$ . Since imidazole also has a characteristic peak here, the difference is not obvious. For Compound 5, the characteristic peak of the ligand was weak at  $2000\text{-}1660\text{ cm}^{-1}$ , and it was also easy to overlap with the peak of imidazole, but it was obviously different from the previous compounds on the whole. Compound 6, 2-ethylimidazole, showed a characteristic peak near  $2900\text{ cm}^{-1}$  that was markedly different from the previous compounds.

### 3. Adsorption Characterization

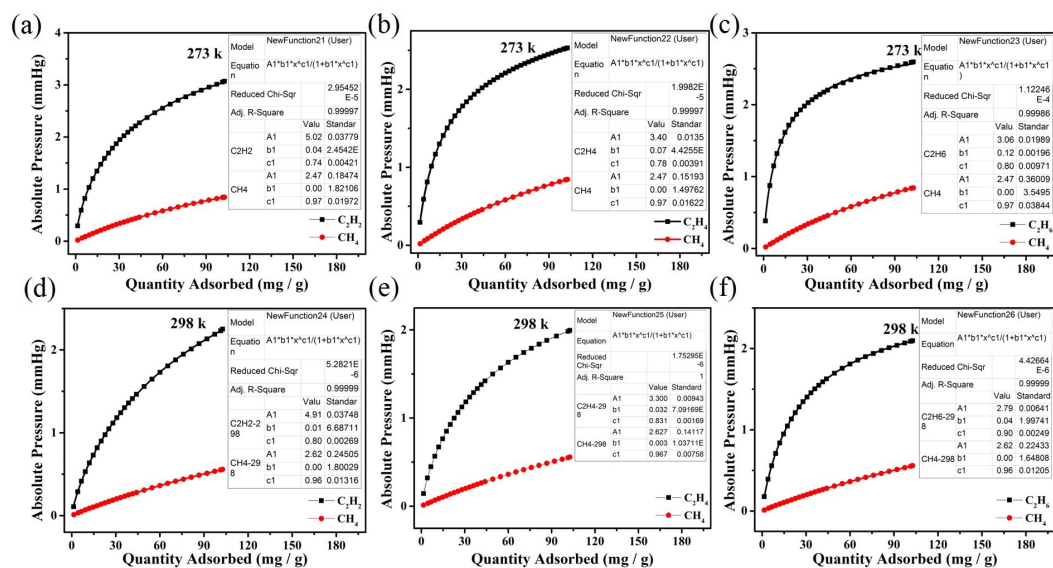

Figure S11. Gas adsorption L-F equation Fitting of Compound 2.

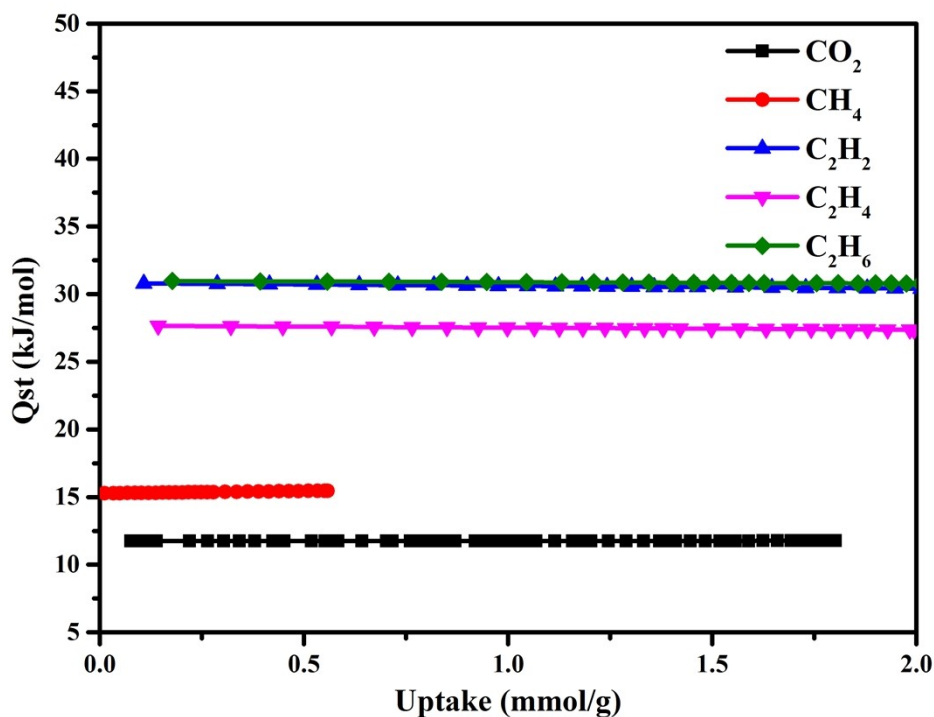

Figure S12. The isosteric heat of Compound 2 for light hydrocarbon and  $CO_2$ .

## References

- [1] Q. Shi, W. J. Xu, R. K. Huang, W. X. Zhang, Y. Li, P. Wang, F. N. Shi, L. Li, J. Li and J. Dong. *J. Am. Chem. Soc.* 2016, **138**, 16232-16235.
- [2] K. S. Park, Z. Ni, A. P. Côté, J. Y. Choi, R. D. Huang, F. J. Uribe-Romo, H. K. Chae, M. O'Keeffe and O. M. Yaghi. *PNAS*. 2006, **103**, 10186-10191.
- [3] R. Banerjee, A. Phan, B. Wang, C. Knobler, H. Furukawa, M. O'Keeffe and O. M. Yaghi. *Science* 2008, **319**, 939-943.

- [4] Y. Q. Tian, Y. M. Zhao, Z. X. Chen, G. N. Zhang, L. H. Weng and D. Y. Zhao. *Chem. Eur. J.* 2007, **13**, 4146-4154.
- [5] J. R. Ramirez, H. Y. Yang, C. M. Kane, A. N. Ley and K. T. Holman. *J. Am. Chem. Soc.* 2016, **138**, 12017-12020.
- [6] I. Brekalo, C. M. Kane, A. N. Ley, J. R. Ramirez, T. Feiscic and K. T. Holman. *J. Am. Chem. Soc.* 2018, **140**, 10104-10108.
- [7] Y. Q. Tian, C. X. Cai, X. M. Ren, C. Y. Duan, Y. Xu, S. Gao and X. Z. You. *Chem. Eur. J.* 2003, **9**, 5673-5685.
- [8] C. A. Schroder, I. A. Baburin, L. V. Wullen, M. Wiebecke and S. Leoni. *CrystEngComm.* 2013, **15**, 4036-4040.
- [9] Q. Shi, X. Z. Kang, F. N. Shi and J. X. Dong. *Chem. Commun.* 2015, **51**, 1131-1134.
- [10] R. Lehnert and F. Seel. *Z. Anorg. Allg. Chem.* 1980, **464**, 187-194.
- [11] Q. Meng, J. Wang, Q. Shi and J. Dong, *CrystEngComm.* 2021, **23**, 3429-3433.
- [12] R Banerjee, A Phan, B Wang , C Knobler , H Furukawa , M O'Keeffe and O M. Yaghi, *Science.* 2008,**319**,939.
- [13] T. Wu, X. Bu, J. Zhang and P. Feng, *Chem. Mater.* 2008, **20**, 7377-7382.
- [14] A.-X. Zhu, R.-B. Lin, X.-L. Qi, Y. Liu, Y.-Y. Lin, J.-P. Zhang and X.-M. Chen, *Micro. Meso. Mat.* 2012, **157**, 42-49.
